# Supplementary material
Source: PubMed Central journal article supplement (PMC5065919)

Supplemental Table 1. Participant Demographics and Behavioral Performance Data

|                                     | <b>Males</b><br><i>n</i> = 21<br>mean (SD) | <b>Females</b><br><i>n</i> = 19<br>mean (SD) | <i>p</i>          |
|-------------------------------------|--------------------------------------------|----------------------------------------------|-------------------|
| Age (range)                         | 39 (18-65)                                 | 38 (19-65)                                   | 0.87              |
| Education                           | 16 (2)                                     | 16 (2)                                       | 0.55              |
| Premorbid Intellectual Functioning* | 115 (8)                                    | 114 (12)                                     | 0.80              |
| SLLT % Accuracy Recall Primacy      | 43 (13)                                    | 46 (14)                                      | 0.37              |
| SLLT % Accuracy Recall Middle       | 31 (11)                                    | 39 (12)                                      | 0.03 <sup>^</sup> |
| SLLT % Accuracy Recall Recency      | 33 (10)                                    | 37 (13)                                      | 0.21              |
| SLLT % Accuracy Total Recall        | 36 (10)                                    | 41 (12)                                      | 0.12              |
| SLLT % Accuracy Recognition         | 60 (11)                                    | 64 (14)                                      | 0.36              |
| CVLT-II Trial 1 %Recall Primacy     | 62 (25)                                    | 73 (22)                                      | 0.27              |
| CVLT-II Trial 1 %Recall Middle      | 30 (19)                                    | 38 (20)                                      | 0.34              |
| CVLT-II Trial 1 %Recall Recency     | 54 (24)                                    | 55 (23)                                      | 0.73              |
| CVLT-II Long Delay %Free Recall     | 80 (18)                                    | 83 (16)                                      | 0.60              |
| CVLT-II Long Delay %Cued Recall     | 84 (15)                                    | 85 (14)                                      | 0.84              |
| CVLT-II Recognition Discrimination  | 15 (1)                                     | 16 (1)                                       | 0.22              |
| CVLT-II Semantic Clustering         | 2 (2)                                      | 2 (3)                                        | 0.89              |
| Trails A Time                       | 23 (6)                                     | 21 (6)                                       | 0.28              |
| Trails B Time                       | 52 (16)                                    | 53 (12)                                      | 0.91              |
| PGNG % Go Accuracy                  | 95 (5)                                     | 94 (4)                                       | 0.70              |
| PGNG % Correct Inhibitions          | 75 (10)                                    | 79 (14)                                      | 0.36              |
| PGNG Reaction Time                  | 475 (38)                                   | 439 (49)                                     | <b>0.02</b>       |
| WCST % Correct                      | 81 (11)                                    | 77 (17)                                      | 0.40              |
| WCST Perseverative Errors           | 10 (8)                                     | 13 (17)                                      | 0.48              |

\*Measured using the Shipley Institute of Living Scale-Vocabulary Test. <sup>^</sup> *p* < .05

Supplemental Table 2. Correlations between SLLT and CVLT-II Performance and Educational and Intellectual Achievement

|                                    | <b>Education</b> | <b>Intellectual Functioning<sup>1</sup></b> |
|------------------------------------|------------------|---------------------------------------------|
| SLLT % Accuracy Recall Primacy     | -0.06            | 0.42*                                       |
| SLLT % Accuracy Recall Middle      | 0.14             | 0.25                                        |
| SLLT % Accuracy Recall Recency     | 0.11             | 0.18                                        |
| SLLT % Accuracy Total Recall       | 0.06             | 0.31                                        |
| SLLT % Accuracy Recognition        | 0.08             | 0.54**                                      |
| CVLT-II Trial 1 % Recall Primacy   | 0.19             | 0.14                                        |
| CVLT-II Trial 1 % Recall Middle    | -0.28            | 0.23                                        |
| CVLT-II Trial 1 % Recall Recency   | -0.06            | 0.34                                        |
| CVLT-II Long Delay % Free Recall   | -0.03            | 0.39                                        |
| CVLT-II Long Delay % Cued Recall   | -0.12            | 0.26                                        |
| CVLT-II Recognition Discrimination | 0.01             | 0.08                                        |
| CVLT-II Semantic Clustering        | -0.04            | 0.13                                        |

<sup>1</sup>Premorbid estimate, measured using the Shipley Institute of Living Scale-Vocabulary Test. Some individuals had the AMNART instead of SILS-V.

\* $p < 0.05$ .

\*\* $p < 0.01$ .

Supplemental Table 3. Activation for Encoding versus Distraction Conditions

| <b>Lobe</b>                       | <b>Foci</b>                                   | <b>BA</b> | <b>x</b> | <b>y</b> | <b>z</b> | <b>mm<sup>3</sup></b> | <b>Z</b> |
|-----------------------------------|-----------------------------------------------|-----------|----------|----------|----------|-----------------------|----------|
| <i>Encoding Minus Distraction</i> |                                               |           |          |          |          |                       |          |
| Frontal                           | Paracentral Lobule, Medial Frontal            | 5/6       | 10       | -40      | 52       | 27000                 | 5.51     |
|                                   | Middle Frontal, Inferior Frontal              | 11/47     | -27      | 32       | -11      | 8296                  | 5.34     |
|                                   | Middle Frontal, Cingulate                     | 8/32      | -20      | 22       | 38       | 12712                 | 5.1      |
| Occipital                         | Middle Frontal                                | 11        | 24       | 30       | -13      | 2120                  | 4.11     |
|                                   | Lingual                                       | 17        | -13      | -93      | -12      | 824                   | 4.52     |
| Temporal                          | Superior Temporal, Parahippocampal            | 34/38     | 31       | 8        | -23      | 3648                  | 4.55     |
|                                   | Fusiform, Culmen                              | 20        | -29      | -38      | -15      | 1408                  | 4.41     |
|                                   | Superior Temporal, Middle Temporal            | 21/22     | -48      | -15      | -8       | 1632                  | 4.11     |
|                                   | Middle Temporal                               | 39        | -47      | -69      | 17       | 1512                  | 3.75     |
|                                   | Superior Temporal, Middle Temporal, Uncus     | 20/38     | -31      | 12       | -33      | 576                   | 3.7      |
| Parietal                          | Middle Temporal                               | 39        | 41       | -65      | 19       | 744                   | 3.6      |
|                                   | Posterior Cingulate                           | 31/29     | 1        | -42      | 26       | 2080                  | 4.06     |
| Limbic                            | Parahippocampal, Lingual, Culmen              | 17/36     | 19       | -36      | -20      | 22280                 | 4.85     |
|                                   | Parahippocampal, Posterior Cingulate, Lingual | 19/30     | -6       | -62      | 12       | 2960                  | 4.84     |
|                                   | Uncus                                         | 20        | 29       | -13      | -38      | 568                   | 4.47     |
|                                   | Parahippocampal                               | 34        | -18      | -11      | -18      | 992                   | 4.42     |
| Subcortical                       | Clastrum, Insula, Thalamus (Pulvinar)         | 13        | 34       | -17      | 15       | 5464                  | 4.81     |
|                                   | Insula                                        | 13        | -47      | -13      | 24       | 1352                  | 3.99     |
|                                   | Caudate (Body), Hypothalamus                  | N/A       | 4        | 10       | 11       | 4112                  | 3.97     |
| <i>Distraction Minus Encoding</i> |                                               |           |          |          |          |                       |          |
| Frontal                           | Middle Frontal                                | 9/10      | -32      | 39       | 21       | 976                   | 3.75     |
|                                   | Cingulate, Medial Frontal, Middle Frontal     | 6/24/32   | 6        | 6        | 41       | 84344                 | 6.48     |
| Parietal                          | Posterior Cingulate                           | 23/29     | 1        | -30      | 18       | 768                   | 4        |
| Occipital                         | Fusiform, Tuber, Uvula                        | 19        | -31      | -71      | -27      | 100360                | 6.43     |
| Temporal                          | Superior Temporal, Insula                     | 13/22     | -43      | 1        | 2        | 816                   | 3.31     |
| Subcortical                       | Clastrum/Insula                               | N/A       | -29      | 14       | 4        | 1040                  | 5.02     |

BA = Brodmann's area; mm<sup>3</sup> = volume of activation in cubic millimeters; Z = cluster Z score; N/A = Not Applicable. AlphaSim corrected *p* value < 0.05.

Supplemental Table 4. Activation for Subsequently Recalled Words

| <b>Lobe</b>                       | <b>Foci</b>                                   | <b>BA</b> | <b>x</b> | <b>y</b> | <b>z</b> | <b>mm3</b> | <b>Z</b> |
|-----------------------------------|-----------------------------------------------|-----------|----------|----------|----------|------------|----------|
| <i>Encoding Minus Distraction</i> |                                               |           |          |          |          |            |          |
| Frontal                           | Paracentral Lobule, Medial Frontal            | 5/6       | 10       | -40      | 52       | 27000      | 5.51     |
|                                   | Middle Frontal, Inferior Frontal              | 11/47     | -27      | 32       | -11      | 8296       | 5.34     |
|                                   | Middle Frontal, Cingulate                     | 8/32      | -20      | 22       | 38       | 12712      | 5.1      |
| Occipital                         | Middle Frontal                                | 11        | 24       | 30       | -13      | 2120       | 4.11     |
|                                   | Lingual                                       | 17        | -13      | -93      | -12      | 824        | 4.52     |
| Temporal                          | Superior Temporal, Parahippocampal            | 34/38     | 31       | 8        | -23      | 3648       | 4.55     |
|                                   | Fusiform, Culmen                              | 20        | -29      | -38      | -15      | 1408       | 4.41     |
|                                   | Superior Temporal, Middle Temporal            | 21/22     | -48      | -15      | -8       | 1632       | 4.11     |
|                                   | Middle Temporal                               | 39        | -47      | -69      | 17       | 1512       | 3.75     |
|                                   | Superior Temporal, Middle Temporal, Uncus     | 20/38     | -31      | 12       | -33      | 576        | 3.7      |
|                                   | Middle Temporal                               | 39        | 41       | -65      | 19       | 744        | 3.6      |
| Parietal                          | Posterior Cingulate                           | 31/29     | 1        | -42      | 26       | 2080       | 4.06     |
| Limbic                            | Parahippocampal, Lingual, Culmen              | 17/36     | 19       | -36      | -20      | 22280      | 4.85     |
|                                   | Parahippocampal, Posterior Cingulate, Lingual | 19/30     | -6       | -62      | 12       | 2960       | 4.84     |
|                                   | Uncus                                         | 20        | 29       | -13      | -38      | 568        | 4.47     |
| Subcortical                       | Parahippocampal                               | 34        | -18      | -11      | -18      | 992        | 4.42     |
|                                   | Clastrum, Insula, Thalamus (Pulvinar)         | 13        | 34       | -17      | 15       | 5464       | 4.81     |
|                                   | Insula                                        | 13        | -47      | -13      | 24       | 1352       | 3.99     |
|                                   | Caudate (Body), Hypothalamus                  | N/A       | 4        | 10       | 11       | 4112       | 3.97     |
| <i>Distraction Minus Encoding</i> |                                               |           |          |          |          |            |          |
| Frontal                           | Middle Frontal                                | 9/10      | -32      | 39       | 21       | 976        | 3.75     |
|                                   | Cingulate, Medial Frontal, Middle Frontal     | 6/24/32   | 6        | 6        | 41       | 84344      | 6.48     |
| Parietal                          | Posterior Cingulate                           | 23/29     | 1        | -30      | 18       | 768        | 4        |
| Occipital                         | Fusiform, Tuber, Uvula                        | 19        | -31      | -71      | -27      | 100360     | 6.43     |
| Temporal                          | Superior Temporal, Insula                     | 13/22     | -43      | 1        | 2        | 816        | 3.31     |
| Subcortical                       | Clastrum/Insula                               | N/A       | -29      | 14       | 4        | 1040       | 5.02     |

BA = Brodmann's area; mm<sup>3</sup> = volume of activation in cubic millimeters; Z = cluster Z score; N/A = Not Applicable. AlphaSim corrected *p* value < 0.05.

Supplemental Table 5. Activation (Event-related) for Subsequently Recognized Words

| <b>Lobe</b>                        | <b>Foci</b>                    | <b>BA</b>                       | <b>x</b> | <b>y</b> | <b>z</b> | <b>mm<sup>3</sup></b> | <b>Z</b> |
|------------------------------------|--------------------------------|---------------------------------|----------|----------|----------|-----------------------|----------|
| Frontal                            | Middle Frontal, Medial Frontal | 8/9                             | -20      | 22       | 38       | 9328                  | 5.13     |
|                                    | Middle Frontal, Medial Frontal | 11/25                           | -25      | 32       | -11      | 4064                  | 4.7      |
|                                    | Middle Frontal                 | 11/47                           | 20       | 30       | -13      | 2112                  | 4.36     |
|                                    | Inferior Frontal               | 13/44                           | -41      | 16       | 11       | 880                   | 3.36     |
|                                    | Limbic                         | Parahippocampus, Uncus, Putamen | 28       | -18      | -9       | -18                   | 2880     |
| Cingulate, Paracentral             |                                | 5/6/24                          | 26       | -19      | 41       | 32664                 | 6.18     |
| Uncus, Superior Temporal Amygdala, |                                | 20/38                           | -34      | -9       | -31      | 2968                  | 4.3      |
| Parahippocampus, Superior Temporal |                                | 20/34                           | 24       | -1       | -21      | 3664                  | 4.29     |
| Uncus                              |                                | 20                              | 29       | -9       | -32      | 1168                  | 4.19     |
| Parahippocampus, Culmen, Lingual   |                                | 30, 36                          | 22       | -40      | -6       | 1024                  | 4.06     |
| Occipital                          |                                | Lingual                         | 17       | -17      | -98      | -11                   | 664      |
| Temporal                           | Fusiform, Hippocampus          | 20                              | -29      | -38      | -15      | 912                   | 3.31     |
|                                    | Clastrum, Insula,              | 13                              | 34       | -17      | 11       | 5312                  | 4.68     |
| SubcSubcortical                    | Putamen                        |                                 |          |          |          |                       |          |
|                                    | Caudate (Head and Body)        |                                 |          |          |          |                       |          |
|                                    | Insula                         | 13                              | -32      | -23      | 11       | 488                   | 3.21     |
| Cerebellum                         | Culmen                         | N/A                             | -15      | -34      | -18      | 456                   | 3.4      |

BA = Brodmann's area; mm<sup>3</sup> = volume of activation in cubic millimeters; Z = cluster Z score; N/A = Not Applicable. AlphaSim corrected *p* value < 0.05.

Supplemental Figure 1. Event-related analysis of subsequently recalled words

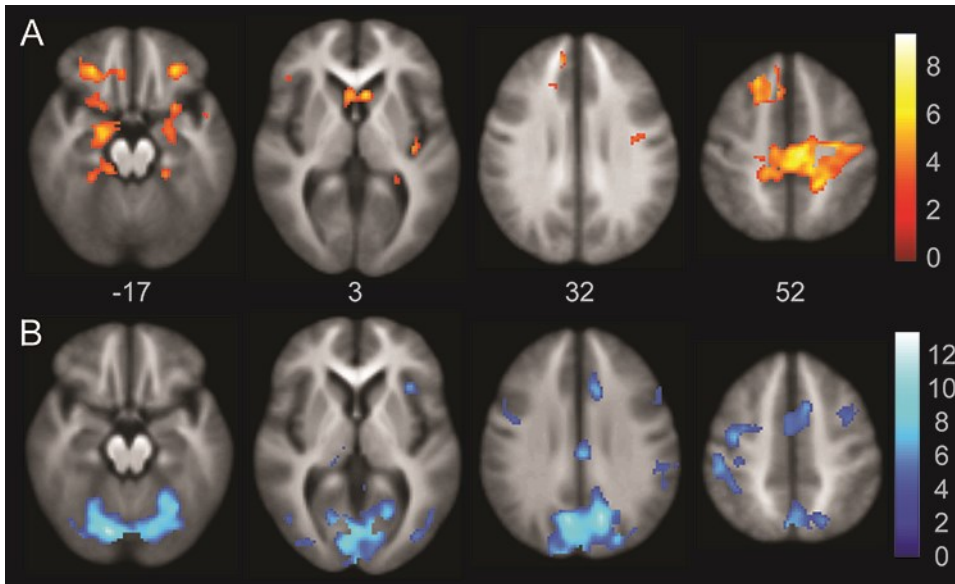

Supplement: NIHMS820206-supplement-supplement_1.pdf [file NIHMS820206-supplement-supplement_1.pdf]
